# Supplementary material for: Vitamin C Supplementation for the Treatment of COVID-19: A Systematic Review and Meta-Analysis
Source: MDPI journal article supplement (doi:10.3390/nu14194217), 2022-10-10
Supplement: s1 [file s1]

# Vitamin C Supplementation for the Treatment of COVID-19: A Systematic Review and Meta-Analysis

## CONTENT

|                                                                                                                                    |   |
|------------------------------------------------------------------------------------------------------------------------------------|---|
| Figure S1. A summary table of review authors' judgements for each risk of bias item for each randomized study. ....                | 2 |
| Figure S2. A plot of the distribution of review authors' judgements across randomized studies for each risk of bias item. ....     | 2 |
| Figure S3. A summary table of review authors' judgements for each risk of bias item for each non-randomized study. ....            | 3 |
| Figure S4. A plot of the distribution of review authors' judgements across non-randomized studies for each risk of bias item. .... | 3 |

|       |                           | Risk of bias domains                                                                                                                                                                                                                                        |                                                                                   |                                                                                   |                                                                                     |                                                                                     |                                                                                                                                                                                                              |
|-------|---------------------------|-------------------------------------------------------------------------------------------------------------------------------------------------------------------------------------------------------------------------------------------------------------|-----------------------------------------------------------------------------------|-----------------------------------------------------------------------------------|-------------------------------------------------------------------------------------|-------------------------------------------------------------------------------------|--------------------------------------------------------------------------------------------------------------------------------------------------------------------------------------------------------------|
|       |                           | D1                                                                                                                                                                                                                                                          | D2                                                                                | D3                                                                                | D4                                                                                  | D5                                                                                  | Overall                                                                                                                                                                                                      |
| Study | Beigmohammadi et al. 2021 |                                                                                                                                                                            |  |  |  |  |                                                                                                                           |
|       | Coppock et al. 2022       |                                                                                                                                                                            |  |  |  |  |                                                                                                                           |
|       | Darban et al. 2021        |                                                                                                                                                                            |  |  |  |  |                                                                                                                           |
|       | Hakamifard et al. 2022    |                                                                                                                                                                            |  |  |  |  |                                                                                                                           |
|       | Kumari et al. 2020        |                                                                                                                                                                            |  |  |  |  |                                                                                                                           |
|       | Majidi et al. 2021        |                                                                                                                                                                            |  |  |  |  |                                                                                                                           |
|       | Siahkali et al. 2021      |                                                                                                                                                                            |  |  |  |  |                                                                                                                           |
|       | Tehrani et al. 2021       |                                                                                                                                                                            |  |  |  |  |                                                                                                                           |
|       | Thomas et al. 2021        |                                                                                                                                                                            |  |  |  |  |                                                                                                                           |
|       | Zhang et al. 2021         |                                                                                                                                                                            |  |  |  |  |                                                                                                                           |
|       |                           | Domains:<br>D1: Bias arising from the randomization process.<br>D2: Bias due to deviations from intended intervention.<br>D3: Bias due to missing outcome data.<br>D4: Bias in measurement of the outcome.<br>D5: Bias in selection of the reported result. |                                                                                   |                                                                                   |                                                                                     |                                                                                     | Judgement<br> Some concerns<br> Low |

Figure S1. A summary table of review authors' judgements for each risk of bias item for each randomized study.

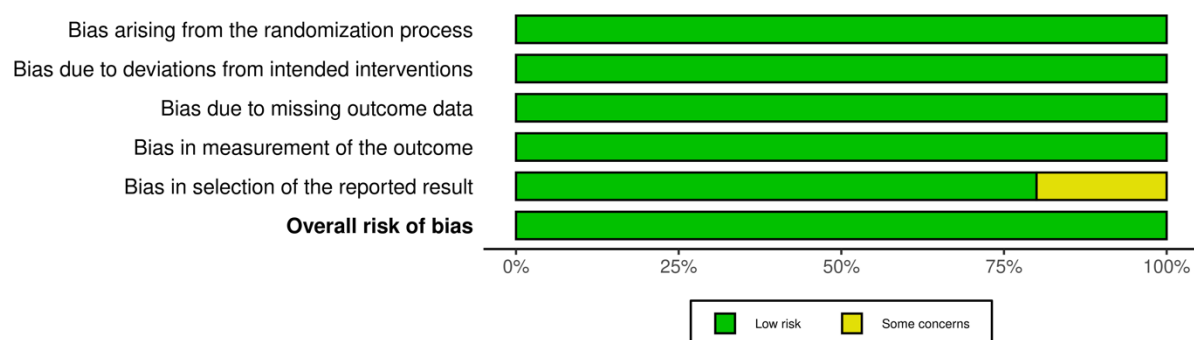

Figure S2. A plot of the distribution of review authors' judgements across randomized studies for each risk of bias item.

|                                                         |                         | Risk of bias domains |    |    |    |    |    |    |         |
|---------------------------------------------------------|-------------------------|----------------------|----|----|----|----|----|----|---------|
|                                                         |                         | D1                   | D2 | D3 | D4 | D5 | D6 | D7 | Overall |
| Study                                                   | Al Sulaiman et al. 2021 | +                    | +  | +  | +  | +  | +  | +  | +       |
|                                                         | Gao et al. 2021         | +                    | +  | +  | +  | +  | +  | +  | +       |
|                                                         | Gavrelatou et al. 2022  | -                    | +  | +  | +  | +  | +  | +  | +       |
|                                                         | Hess et al. 2022        | +                    | -  | +  | +  | -  | -  | +  | +       |
|                                                         | Li et al. 2021          | +                    | -  | +  | +  | -  | +  | +  | +       |
|                                                         | Simsek et al. 2021      | +                    | +  | +  | +  | +  | -  | +  | +       |
|                                                         | Suna et al. 2022        | -                    | +  | +  | +  | +  | +  | -  | +       |
|                                                         | Zhao et al. 2021        | -                    | +  | +  | +  | +  | -  | -  | +       |
|                                                         | Zheng et al. 2021       | +                    | +  | +  | +  | +  | +  | +  | +       |
| Domains:                                                |                         | Judgement            |    |    |    |    |    |    |         |
| D1: Bias due to confounding.                            |                         | - Moderate           |    |    |    |    |    |    |         |
| D2: Bias due to selection of participants.              |                         | + Low                |    |    |    |    |    |    |         |
| D3: Bias in classification of interventions.            |                         |                      |    |    |    |    |    |    |         |
| D4: Bias due to deviations from intended interventions. |                         |                      |    |    |    |    |    |    |         |
| D5: Bias due to missing data.                           |                         |                      |    |    |    |    |    |    |         |
| D6: Bias in measurement of outcomes.                    |                         |                      |    |    |    |    |    |    |         |
| D7: Bias in selection of the reported result.           |                         |                      |    |    |    |    |    |    |         |

Figure S3. A summary table of review authors' judgements for each risk of bias item for each non-randomized study.

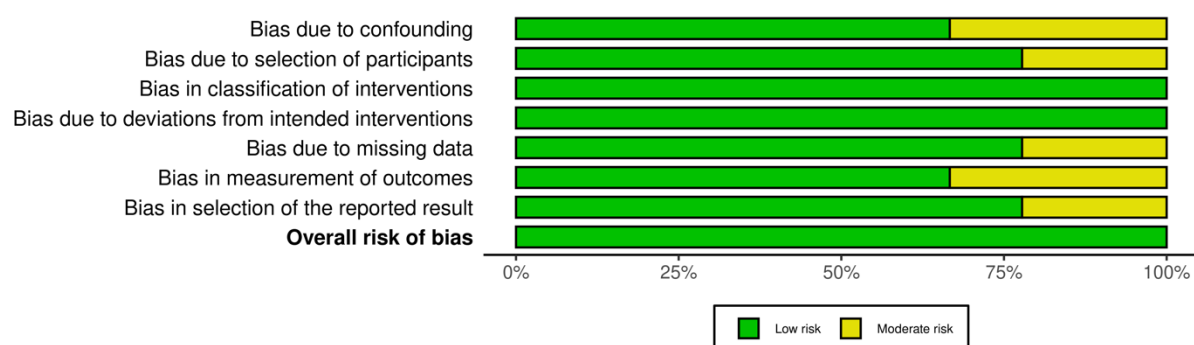

Figure S4. A plot of the distribution of review authors' judgements across non-randomized studies for each risk of bias item.
